# Supplementary material for: Anyone but Me: Unrealistic Optimism, Emotions and Anxiety in the Face of COVID-19 Pandemic
Source: MDPI journal article supplement (doi:10.3390/ijerph20010301), 2022-12-25
Supplement: s1 [file s1]

## Supplementary File S2 (Polish version of the questionnaire)

Dzień dobry,

jesteśmy grupą badaczy z Wydziału Psychologii Uniwersytetu Warszawskiego.

Przeprowadzamy badanie dotyczące doświadczanych emocji i zachowań w związku z epidemią koronawirusa w Polsce. Udział w badaniu jest zupełnie anonimowy i dobrowolny (można przerwać wypełnianie w każdej chwili). Dane będą analizowane wyłącznie zbiorczo i wykorzystane tylko w celach naukowych.

Klikając przycisk „dalej”, wyrażasz zgodę na udział w badaniu.

*Zaznacz na poniższej skali, jak bardzo prawdopodobna wydaje Ci się opisana sytuacja:*

Mogę zarazić się koronawirusem.

1 ————— 100

Zupełnie nieprawdopodobne

Bardzo

prawdopodobne

Przeciętna osoba w moim wieku i kondycji fizycznej może zarazić się koronawirusem.

1 ————— 100

Zupełnie nieprawdopodobne

Bardzo

prawdopodobne

*Zaznacz, w jakim stopniu doświadczasz poniższych emocji w obecnej sytuacji.*

bezradność

w niewielkim stopniu  
stopniu

w znaczącym

1 ————— 100

frustracja

w niewielkim stopniu  
stopniu

w znaczącym

1 ————— 100

przerażenie

w niewielkim stopniu  
stopniu

w znaczącym

1 ————— 100

zasmucenie

w niewielkim stopniu  
stopniu

w znaczącym

1 ————— 100

rozczarowanie

w niewielkim stopniu  
stopniu

w znaczącym

1 ————— 100

pogarda

w niewielkim stopniu  
stopniu

w znaczącym

1 ————— 100

ukojenie

w niewielkim stopniu  
stopniu

w znaczącym

1 ————— 100

odprężenie

w niewielkim stopniu  
stopniu

w znaczącym

1 ————— 100

wyzwolenie

w niewielkim stopniu  
stopniu

w znaczącym

1 ————— 100

współczucie

w niewielkim stopniu  
stopniu

w znaczącym

1-----100

nadzieja

w niewielkim stopniu  
stopniu

w znaczącym

1-----100

szczęście

w niewielkim stopniu  
stopniu

w znaczącym

1-----100

*Proszę określić, w jakim stopniu zgadzasz się z następującym stwierdzeniem. Proszę użyć skali od 1 do 7, gdzie 1 oznacza, "zdecydowanie się nie zgadzam", a 7 – "zdecydowanie się zgadzam".*

1. Zarażenie się koronawirusem (powodującym chorobę COVID – 19) jest dla mnie realnym zagrożeniem.

1-----2-----3-----4-----5-----6-----7

zdecydowanie nie zgadzam się  
zgadzam

zdecydowanie się

2. Martwię się możliwością zarażenia się koronawirusem.

1-----2-----3-----4-----5-----6-----7

zdecydowanie nie zgadzam się  
zgadzam

zdecydowanie się

3. Mam duży wpływ na to, czy zarażę się koronawirusem.

1 — — — — 2 — — — — 3 — — — — 4 — — — — 5 — — — — 6 — — — — 7

zdecydowanie nie zgadzam się  
zgadzam

zdecydowanie się

4. Dobrze wiem, co robić, żeby nie zarazić się koronawirusem.

1 — — — — 2 — — — — 3 — — — — 4 — — — — 5 — — — — 6 — — — — 7

zdecydowanie nie zgadzam się  
zgadzam

zdecydowanie się

5. Mam poczucie, że koronawirus nie stanowi poważnego zagrożenia dla mojego  
zdrowia.

1 — — — — 2 — — — — 3 — — — — 4 — — — — 5 — — — — 6 — — — — 7

zdecydowanie nie zgadzam się  
zgadzam

zdecydowanie się

6. Mam poczucie, że koronawirus nie stanowi poważnego zagrożenia dla mojego życia.

1 — — — — 2 — — — — 3 — — — — 4 — — — — 5 — — — — 6 — — — — 7

zdecydowanie nie zgadzam się  
zgadzam

zdecydowanie się

7. Koronawirus jest zagrożeniem, z którym wiemy, jak sobie poradzić.

1 — — — — 2 — — — — 3 — — — — 4 — — — — 5 — — — — 6 — — — — 7

zdecydowanie nie zgadzam się  
zgadzam

zdecydowanie się

*Wymień działania, które podejmujesz w związku z pandemią koronawirusa, żeby ochronić się przed zarażeniem (np. częstsze mycie rąk):*

---

*Płeć:*

Kobieta

Mężczyzna

Inna

*Wiek:*

---

*Wykształcenie:*

Podstawowe

Gimnazjalne

Średnie

Wyższe

Czy byłeś/byłaś zarażony/zarażona koronawirusem?

Tak

Nie

Dziękujemy za wypełnienie ankiety!

Celem badania był pomiar emocji odczuwanych w związku z sytuacją pandemii.

Chcieliśmy również zbadać zjawisko nierealistycznego optymizmu – złudzenie, że jesteśmy nietykalni i złe rzeczy zwyczajnie nie mogą nam się przytrafić. Interesowało nas, czy to zjawisko może mieć miejsce w kontekście pandemii koronawirusa.

Jeśli masz jakiegokolwiek pytania odnośnie procedury badawczej lub chciałbyś/chciałabyś poznać wyniki, prosimy o kontakt mailowy: [a.wielgopolan2@student.uw.edu.pl](mailto:a.wielgopolan2@student.uw.edu.pl)

Jeszcze raz dziękujemy za udział w badaniu!
